# Supplementary material for: Neurite architecture of the planum temporale predicts neurophysiological processing of auditory speech
Source: PubMed Central journal article supplement — Sci Adv. 2018 Jul 11;4(7):eaar6830. doi: 10.1126/sciadv.aar6830 (PMC6040861; doi:10.1126/sciadv.aar6830), 2018-07-11
Supplement: aar6830_SM.pdf [file aar6830_SM.pdf]

## Supplementary Materials for

### Neurite architecture of the planum temporale predicts neurophysiological processing of auditory speech

Sebastian Ocklenburg\*, Patrick Friedrich, Christoph Fraenz, Caroline Schlüter, Christian Beste, Onur Güntürkün, Erhan Genç

\*Corresponding author. Email: sebastian.ocklenburg@rub.de

Published 11 July 2018, *Sci. Adv.* 4, eaar6830 (2018)  
DOI: 10.1126/sciadv.aar6830

#### This PDF file includes:

- Table S1. Correlations between VOL of PT and N1 latency during dichotic condition.
- Table S2. Correlations between ODI of PT and N1 latency during dichotic condition.
- Table S3. Correlations between ISO of PT and N1 latency during dichotic condition.
- Table S4. Correlations between VOL of PT and N1 latency during noise condition.
- Table S5. Correlations between INVf of PT and N1 latency during noise condition.
- Table S6. Correlations between ODI of PT and N1 latency during noise condition.
- Table S7. Correlations between ISO of PT and N1 latency during noise condition.
- Table S8. Multiple regression analysis (alternative model 1) predicting left N1 latency during dichotic condition by structural predictors.
- Table S9. Multiple regression analysis predicting left N1 latency during dichotic condition by structural predictors.
- Table S10. Correlations between VOL of AF and N1 latency during dichotic condition.
- Table S11. Correlations between INVf of AF and N1 latency during dichotic condition.
- Table S12. Correlations between ODI of AF and N1 latency during dichotic condition.
- Table S13. Correlations between ISO of AF and N1 latency during dichotic condition.
- Fig. S1. Sagittal view of the left AF.

## Supplementary material

### Supplementary tables

VOL = gray matter volume, INVf = intra-neurite volume fraction, ODI = orientation dispersion, ISO = isotropic diffusion, p-values are two-tailed and Bonferroni-corrected for multiple comparisons.

**Table S1. Correlations between VOL of PT and N1 latency during dichotic condition.**

|                                | VOL left planum temporale | VOL right planum temporale |
|--------------------------------|---------------------------|----------------------------|
| Left N1 latency dichotic (C5)  | $r = .19, p = .24$        | $r = -.02, p = .99$        |
| Right N1 latency dichotic (C6) | $r = -.05, p = .99$       | $r = -.19, p = .24$        |

**Table S2. Correlations between ODI of PT and N1 latency during dichotic condition.**

|                                | ODI left planum temporale | ODI right planum temporale |
|--------------------------------|---------------------------|----------------------------|
| Left N1 latency dichotic (C5)  | $r = .05, p = .99$        | $r = .16, p = .48$         |
| Right N1 latency dichotic (C6) | $r = .03, p = .99$        | $r = .00, p = .99$         |

**Table S3. Correlations between ISO of PT and N1 latency during dichotic condition.**

|                                | ISO left planum temporale | ISO right planum temporale |
|--------------------------------|---------------------------|----------------------------|
| Left N1 latency dichotic (C5)  | $r = .10, p = .99$        | $r = .08, p = .99$         |
| Right N1 latency dichotic (C6) | $r = -.02, p = .99$       | $r = .00, p = .99$         |

**Table S4. Correlations between VOL of PT and N1 latency during noise condition.**

|                             | VOL left planum temporale | VOL right planum temporale |
|-----------------------------|---------------------------|----------------------------|
| Left N1 latency noise (C5)  | $r = -.10, p = .99$       | $r = -.18, p = .99$        |
| Right N1 latency noise (C6) | $r = -.04, p = .99$       | $r = -.03, p = .99$        |

**Table S5. Correlations between INVf of PT and N1 latency during noise condition.**

|                             | INVf left planum temporale | INVf right planum temporale |
|-----------------------------|----------------------------|-----------------------------|
| Left N1 latency noise (C5)  | $r = .01, p = .99$         | $r = .19, p = .24$          |
| Right N1 latency noise (C6) | $r = .10, p = .99$         | $r = .04, p = .99$          |

**Table S6. Correlations between ODI of PT and N1 latency during noise condition.**

|                             | ODI left planum temporale | ODI right planum temporale |
|-----------------------------|---------------------------|----------------------------|
| Left N1 latency noise (C5)  | $r = .03, p = .99$        | $r = -.07, p = .48$        |
| Right N1 latency noise (C6) | $r = -.02, p = .99$       | $r = -.03, p = .99$        |

**Table S7. Correlations between ISO of PT and N1 latency during noise condition.**

|                             | ISO left planum temporale | ISO right planum temporale |
|-----------------------------|---------------------------|----------------------------|
| Left N1 latency noise (C5)  | $r = .20, p = .20$        | $r = -.17, p = .99$        |
| Right N1 latency noise (C6) | $r = -.04, p = .99$       | $r = -.15, p = .52$        |

**Table S8. Multiple regression analysis (alternative model 1) predicting left N1 latency during dichotic condition by structural predictors.**

INVF = intra-neurite volume fraction, ODI = orientation dispersion, ISO = isotropic diffusion, VOL = gray matter volume.

| Predictors                | <i>beta</i> | <i>t</i> | <i>p value</i> |
|---------------------------|-------------|----------|----------------|
| Left PT INVf              | -.23        | -2.27    | .03            |
| Left PT ODI               | .07         | .71      | .48            |
| Left PT ISO               | .14         | 1.44     | .15            |
| Left PT VOL               | .08         | .83      | .41            |
| Sex                       | -.20        | -1.90    | .06            |
| Laterality quotient (EHI) | -.02        | -.17     | .87            |

Dependent variable: left N1 latency dichotic (C5)  $R^2 = .15; p = .024$

**Table S9. Multiple regression analysis predicting left N1 latency during dichotic condition by structural predictors.** INVF = intra-neurite volume fraction, ODI = orientation dispersion, ISO = isotropic diffusion, THICK = gray matter thickness.

| Predictors                 | <i>beta</i> | <i>t</i> | <i>p value</i> |
|----------------------------|-------------|----------|----------------|
| Left planum temporale INVf | -.24        | -2.33    | .02            |
| Left planum temporale ODI  | .13         | 1.28     | .21            |
| Left planum temporale ISO  | .13         | 1.29     | .20            |
| Left planum temporale THIC | -.07        | -0.69    | .49            |

Dependent variable: left N1 latency dichotic (C5)  $R^2 = .10; p = .044$

**Table S10. Correlations between VOL of AF and N1 latency during dichotic condition.**

|                                | VOL left AF         | VOL right AF        |
|--------------------------------|---------------------|---------------------|
| Left N1 latency dichotic (C5)  | $r = -.05, p = .99$ | $r = -.04, p = .99$ |
| Right N1 latency dichotic (C6) | $r = -.02, p = .99$ | $r = .16, p = .50$  |

**Table S11. Correlations between INVF of AF and N1 latency during dichotic condition.**

|                                | INVF left AF        | INVF right AF       |
|--------------------------------|---------------------|---------------------|
| Left N1 latency dichotic (C5)  | $r = .16, p = .50$  | $r = .06, p = .99$  |
| Right N1 latency dichotic (C6) | $r = -.06, p = .99$ | $r = -.16, p = .50$ |

**Table S12. Correlations between ODI of AF and N1 latency during dichotic condition.**

|                                | ODI left AF         | ODI right AF       |
|--------------------------------|---------------------|--------------------|
| Left N1 latency dichotic (C5)  | $r = -.04, p = .99$ | $r = .05, p = .99$ |
| Right N1 latency dichotic (C6) | $r = .03, p = .99$  | $r = .13, p = .84$ |

**Table S13. Correlations between ISO of AF and N1 latency during dichotic condition.**

|                                | ISO left AF         | ISO right AF        |
|--------------------------------|---------------------|---------------------|
| Left N1 latency dichotic (C5)  | $r = -.09, p = .99$ | $r = -.10, p = .99$ |
| Right N1 latency dichotic (C6) | $r = -.09, p = .99$ | $r = -.07, p = .99$ |

VOL = white matter volume, INVF = intra-neurite volume fraction, ODI = orientation dispersion, ISO = isotropic diffusion, p-values are two-tailed and Bonferroni-corrected for multiple comparisons.

## Supplementary Figure captions

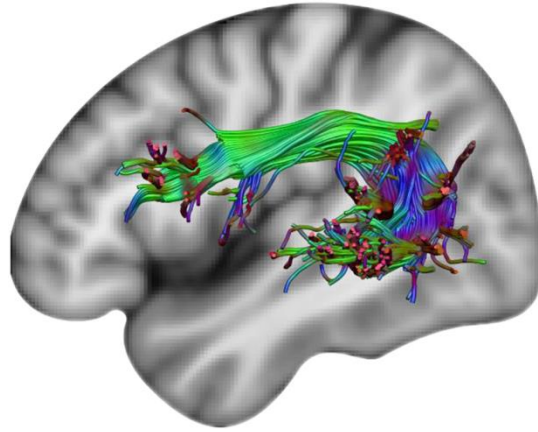

**Fig. S1. Sagittal view of the left AF.** The arcuate fasciculus was tracked by in vivo spherical deconvolution DTI fiber tractography and overlaid onto the anatomy of a representative individual. The colors represent fiber orientations in different directions: right-left (red), anterior-posterior (green) and superior-inferior (blue).
